# Supplementary material
Source: Springer Nature journal article supplement (https://www.springermedizin.de/resource/supplementary/12936_2006_328_MOESM2_ESM.pdf/9547550)

Allelic Discrimination Plot

- Legend
- × Undetermined
  - Allele X
  - Both
  - Allele Y
  - NTC

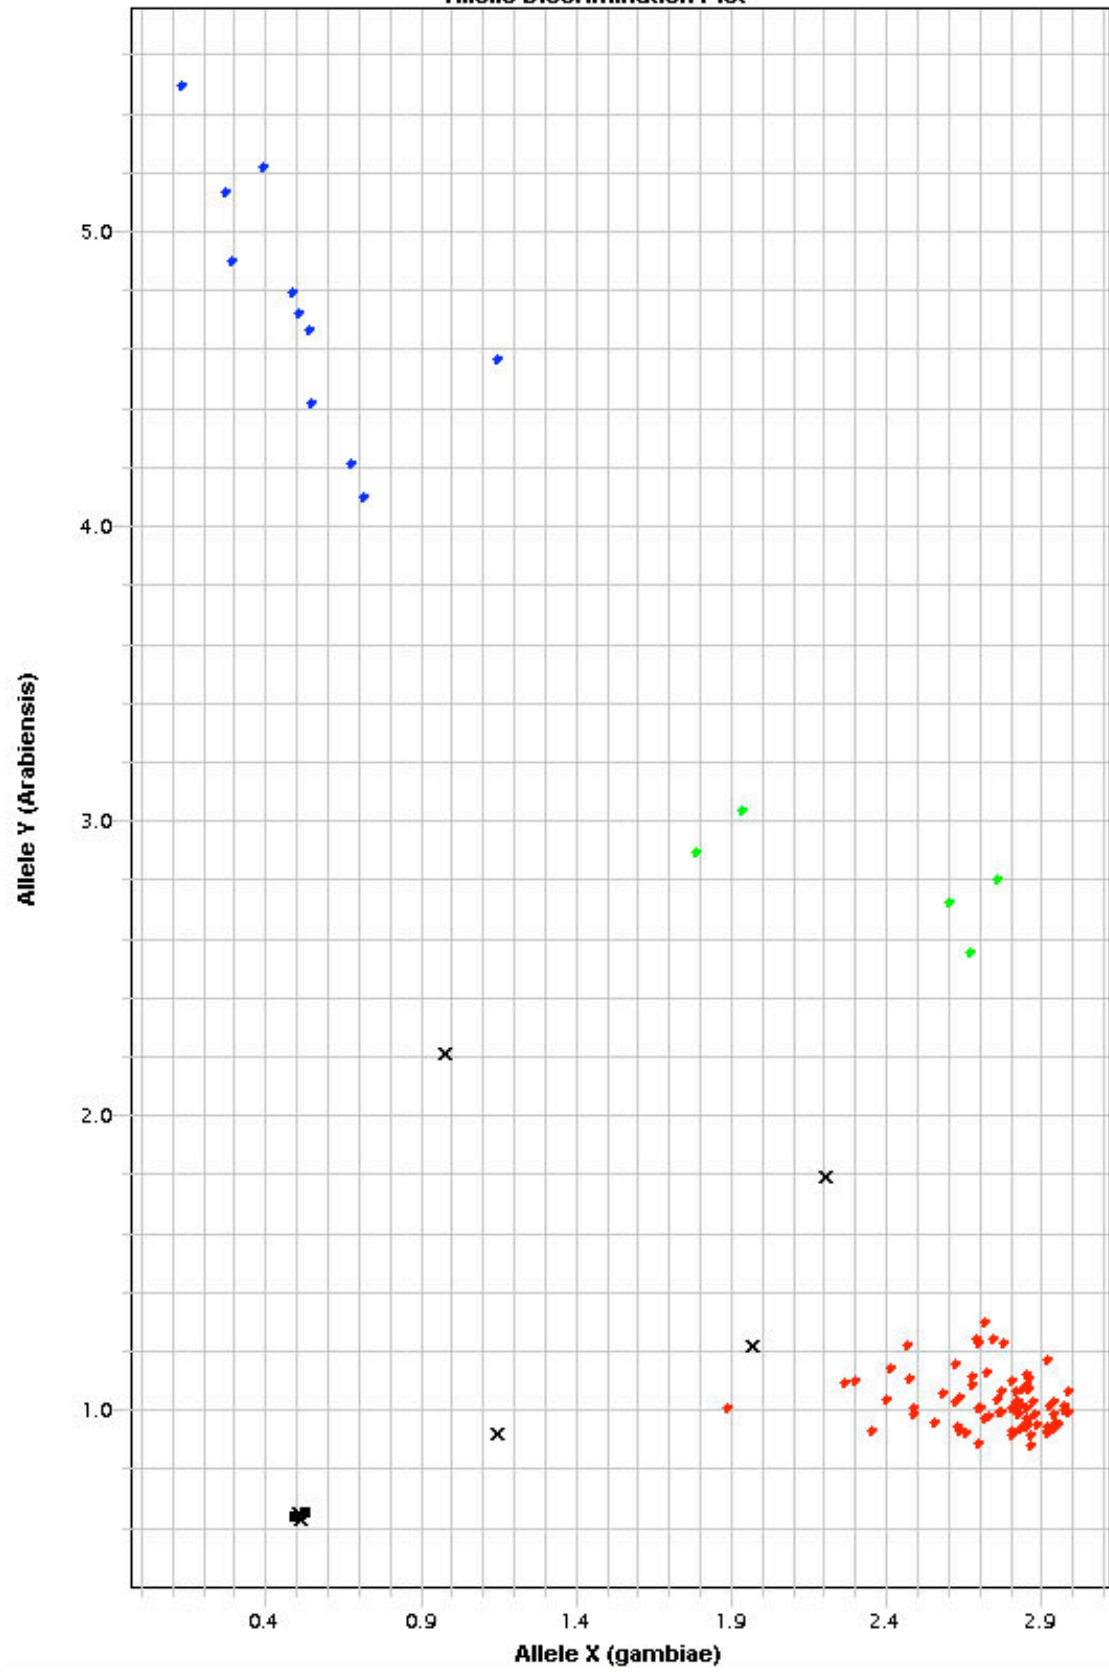

Supplement: MOESM2 [file 9547550]
